# Supplementary material
Source: PubMed Central journal article supplement (PMC4086474)
Supplement: Supp_Fig1.pdf [file Supp_Fig1.pdf]

## Supplementary Data

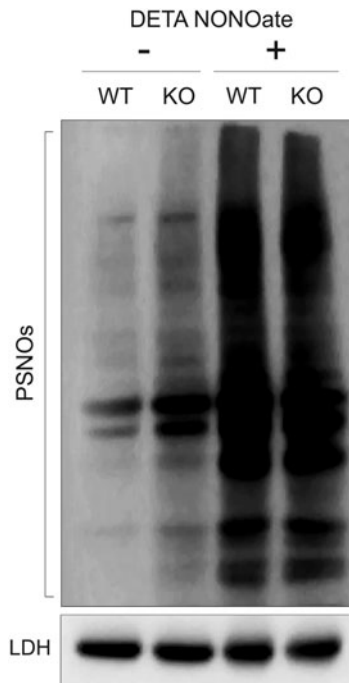

**SUPPLEMENTARY FIG. S1. Reliability of the biotin-switch assay.** Evaluation of protein *S*-nitrosothiols (PSNOs) amount in total homogenates of *tibialis anterior* of 2-month-old GSNOR-KO (KO) and wild-type (WT) mice, treated with (+) or without (-) 2 mM DETA NONOate for 30 min at room temperature. On incubation, lysates were subjected to biotin-switch assay and revealed by incubation with HRP-conjugated streptavidin. LDH was selected as a loading control.
