# Supplementary material
Source: PubMed Central journal article supplement (PMC4086474)
Supplement: Supp_Fig2.pdf [file Supp_Fig2.pdf]

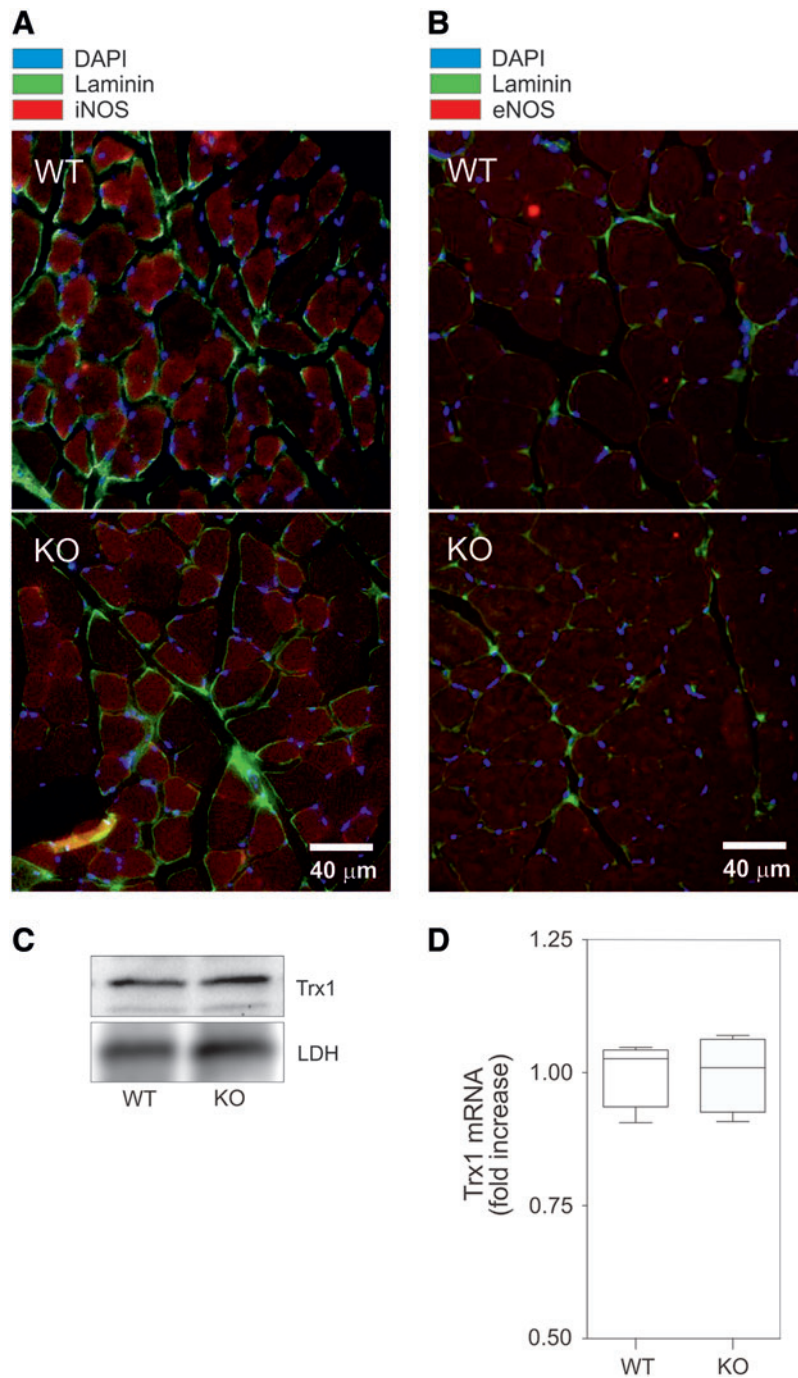

**SUPPLEMENTARY FIG. S2. Inducible nitric oxide synthase (iNOS) and endothelial NOS (eNOS) distribution and thioredoxin 1 modulation in GSNOR-KO muscles.** Representative fluorescence microscopy images of *tibialis anterior* sections from GSNOR-KO (KO) and wild-type (WT) mice on staining with anti-iNOS (**A**) and anti-eNOS (**B**). Scale bar, 40  $\mu\text{m}$ . (**C**) Western blot analyses of thioredoxin 1 (Trx1) performed in *tibialis anterior* homogenates from KO and WT mice. LDH was selected as a loading control. (**D**) Quantitative real-time PCR analyses of Trx1 performed in *gastrocnemius* homogenates from KO and WT mice. Results shown are the means  $\pm$  SEM. of  $n=5$  animals for each group.
