# Supplementary material
Source: PubMed Central journal article supplement (PMC4086474)
Supplement: Supp_Fig3.pdf [file Supp_Fig3.pdf]

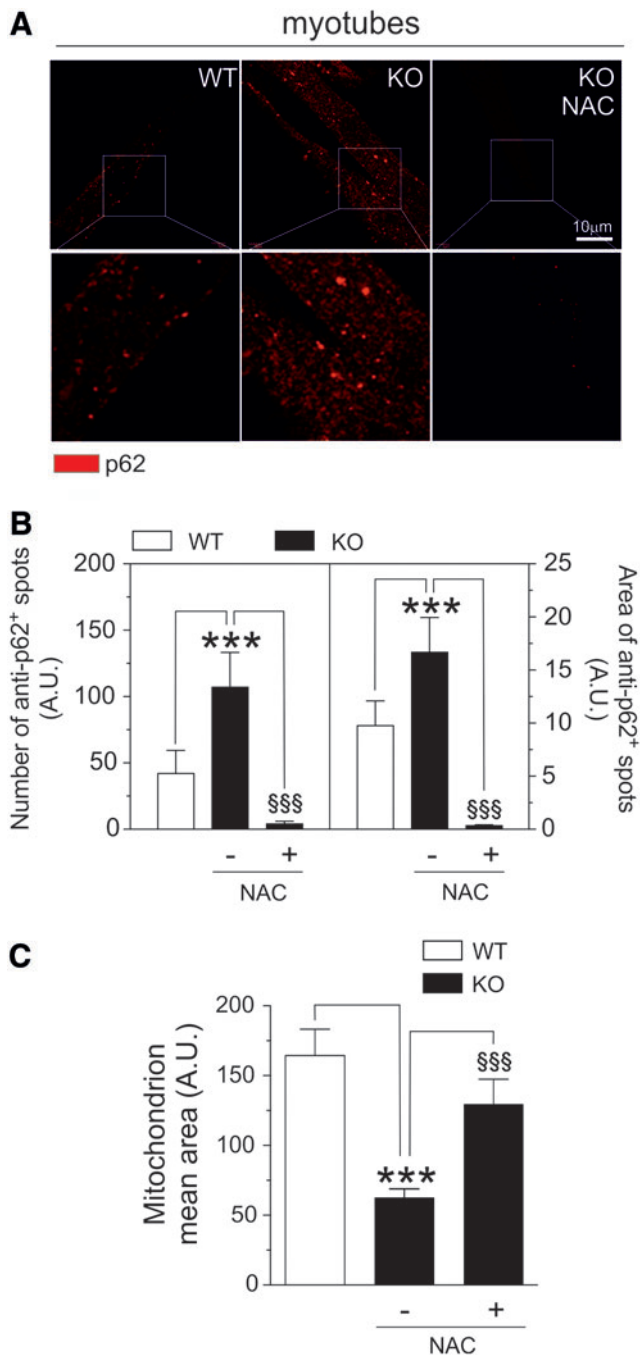

**SUPPLEMENTARY FIG. S3. Quantitative analysis of p62-positive spots and of mitochondrial area.** (A) Higher magnification of fluorescence microscopy images of myotubes derived from GSNOR-KO and wild-type (WT) mice incubated or not with 5 mM NAC for 2 h on staining with an antibody against p62. Quantification of p62<sup>+</sup> spots (B) and mitochondrial area (C) in myotubes, derived from KO and WT mice, incubated or not with 5 mM NAC for 2 h, were assessed by *CellProfiler* software. Values shown are the means  $\pm$  SD of  $n=3$  different experiments. \*\*\* $p < 0.001$  calculated with regard to WT; §§§ $p < 0.001$  calculated with regard to NAC-untreated KO myotubes.
