# Supplementary material
Source: PubMed Central journal article supplement (PMC4086474)
Supplement: Supp_Fig4.pdf [file Supp_Fig4.pdf]

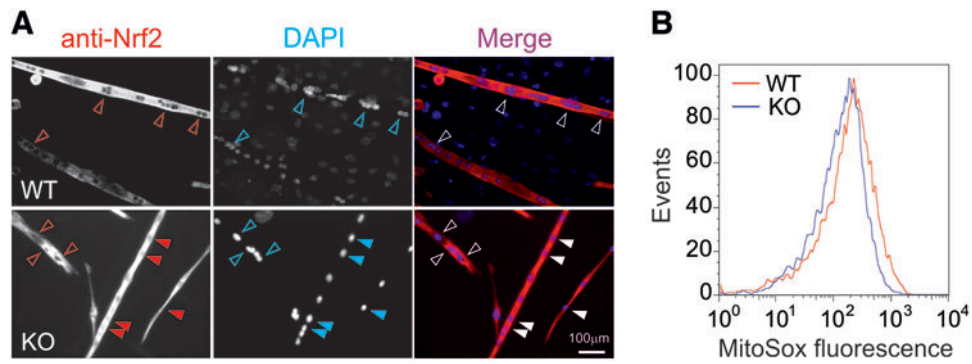

**SUPPLEMENTARY FIG. S4. Analysis of Nrf2 localization and mitochondrial superoxide production.** (A) Representative fluorescence microscopy images of myotubes derived from GSNOR-KO (KO) and wild-type (WT) mice on staining with anti-Nrf2. Scale bar, 100  $\mu$ m, closed arrowheads: nuclei containing Nrf2, open arrowheads: nuclei without Nrf2 (B) Cytofluorometric evaluation of mitochondrial superoxide levels, detected with MitoSOX probe, in MEFs derived from WT and KO mice.
